# Supplementary material for: Norepinephrinergic projection from locus coeruleus to parafascicular nucleus promotes pain and anxiety-like behaviors in mice
Source: JCI journal article supplement (doi:10.1172/jci.insight.198224), 2026-04-07
Supplement: sd2 [file 2]

Full unedited gel for Figure 5B.

rabbit anti-Th

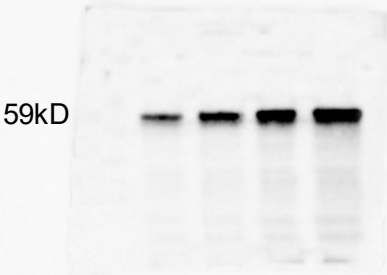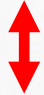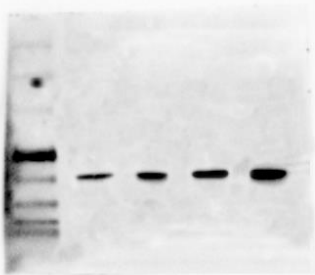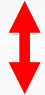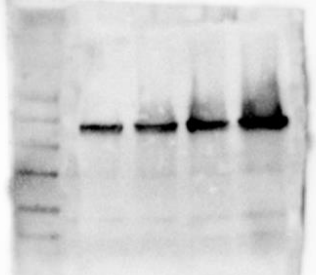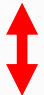

mouse anti-β-actin

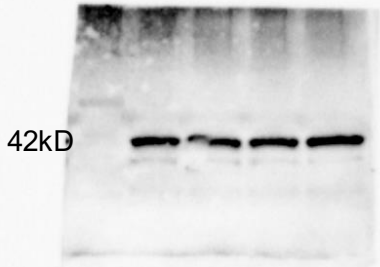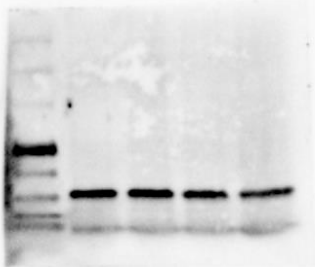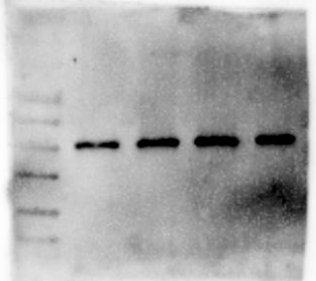

Put it in the figure.

Full unedited gel for Figure 6F.

mouse anti-ADRA2A

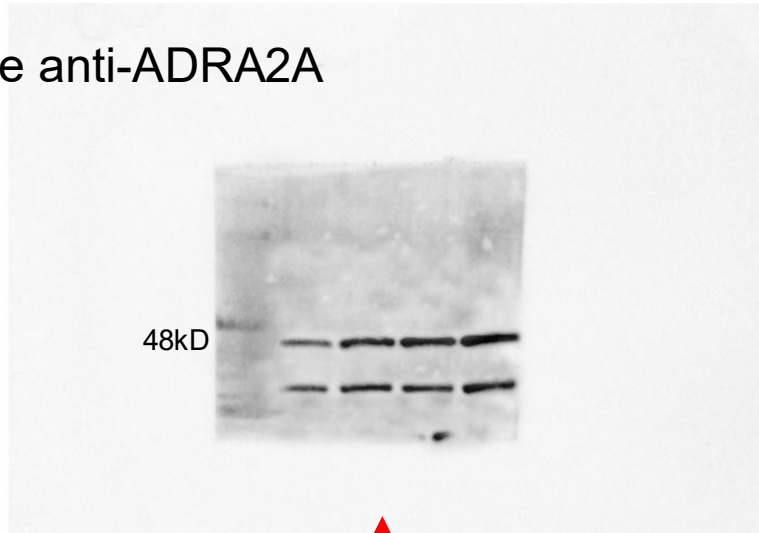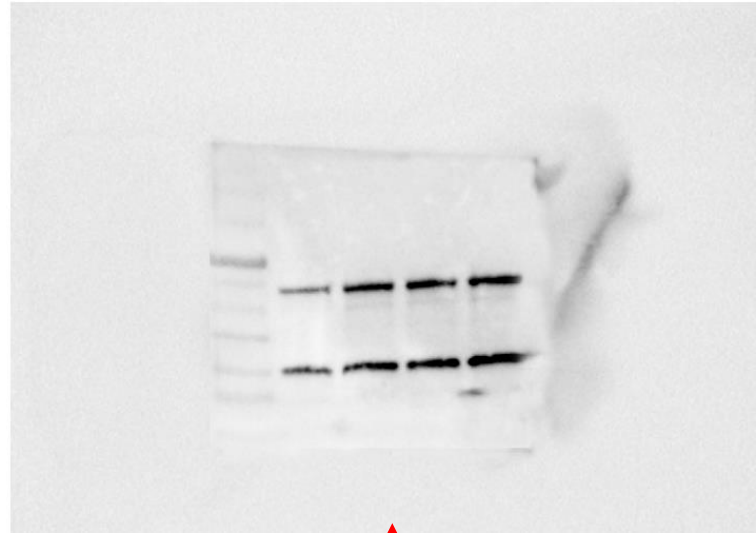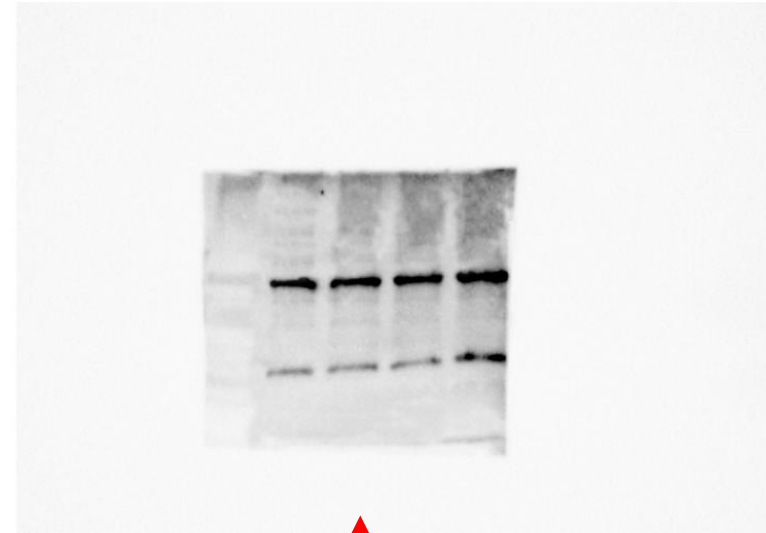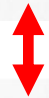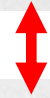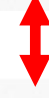

mouse anti- $\beta$ -actin

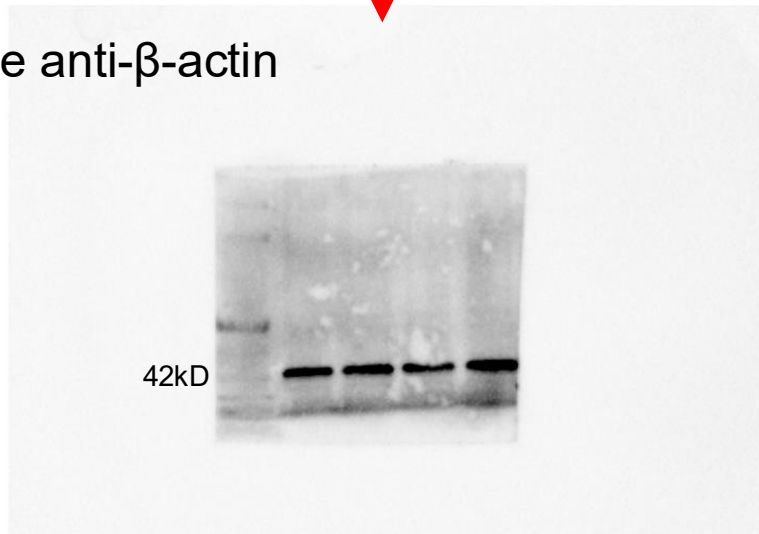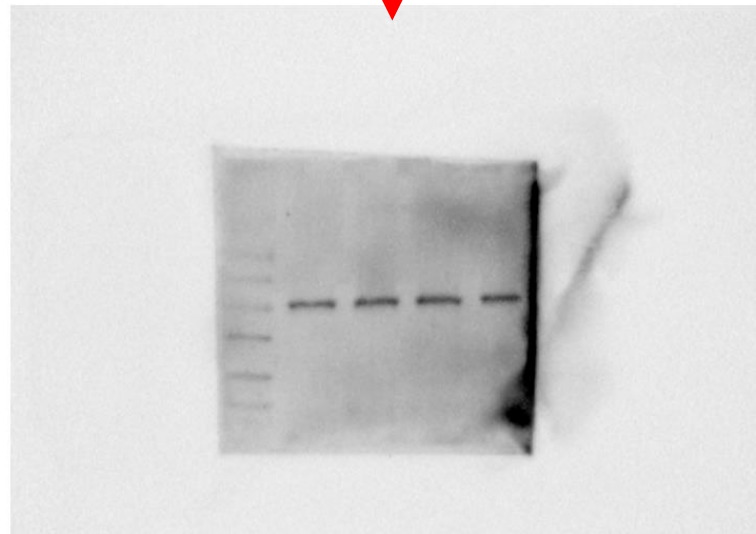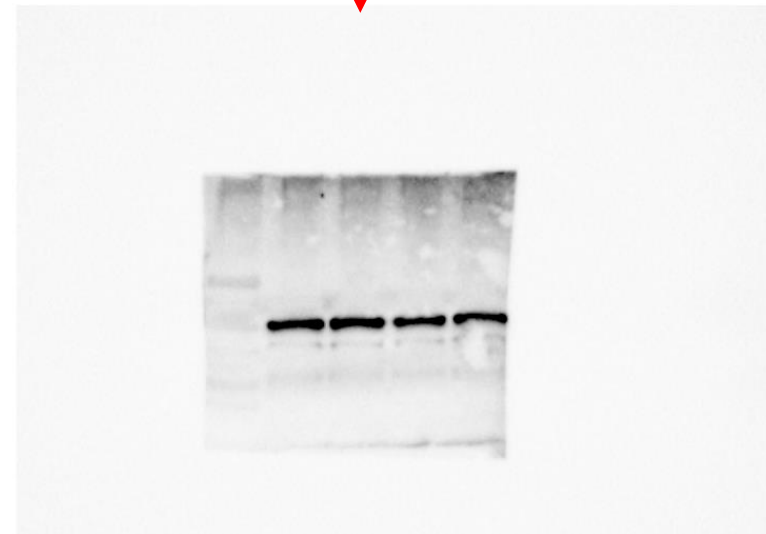

Put it in the figure.
